# Supplementary material for: An optimized 3D carbon matrix for high rate silicon anodes
Source: Royal Society of Chemistry journal article supplement (doi:10.1039/c7ra05647h), 2017-01-01
Supplement: c7ra05647h1.pdf [file c7ra05647h1.pdf]

## Supporting Information

### An Optimized 3D Carbom Matrix for High Rate Silicon Anode

Xuejun Bai<sup>a\*</sup>, Min Hou<sup>a</sup>, Zhaoyu Yu<sup>a</sup>, Chan Liu<sup>a</sup>, Hui Cao<sup>a,b</sup>, Dong Wang<sup>a,b</sup>, Junjie Fu<sup>c</sup>

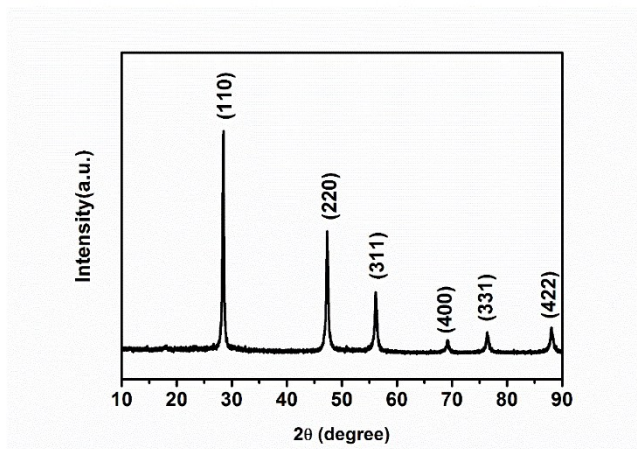

Fig.S1 XRD pattern of residue powder after TGA test.

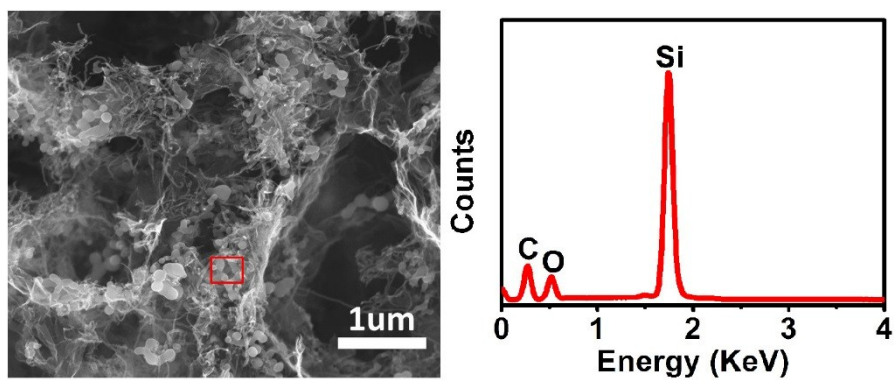

Fig.S2 EDS spectra of Si@SiO<sub>x</sub>/CNTs/GA-1 composite.

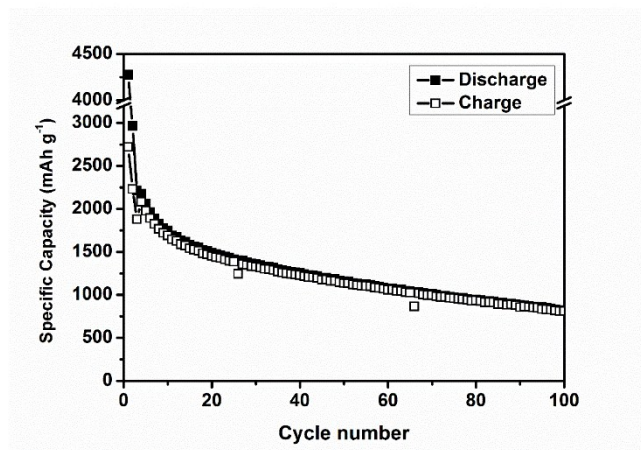

**Fig.S3** Cyclic performance of Si@SiO<sub>x</sub> particles, with 0.1A g<sup>-1</sup> current density.
